# Supplementary material for: Antibiotic Residues in UK Foods: Exploring the Exposure Pathways and Associated Health Risks
Source: MDPI journal article supplement (doi:10.3390/toxics12030174), 2024-02-24
Supplement: s1 [file s1]

# Antibiotic Residues in UK Foods: Exploring the Exposure Pathways and Associated Health Risks

Jegak Seo <sup>1,\*</sup>, Frank Klopprogge <sup>2</sup>, Andrew M. Smith <sup>3</sup>, Kersti Karu <sup>4</sup> and Lena Ciric <sup>1</sup>

<sup>1</sup> Healthy Infrastructure Research Group, Department of Civil, Environmental and Geomatic Engineering, University College London, Gower Street, London WC1E 6BT, UK

<sup>2</sup> Institute for Global Health, University College London, Rowland Hill Street, London NW3 2PF, UK

<sup>3</sup> Eastman Dental Institute, University College London, Rowland Hill Street, London NW3 2PF, UK

<sup>4</sup> Department of Chemistry, University College London, 20 Gordon Street, London WC1H 0AJ, UK

\* Correspondence: [jegak.seo.20@ucl.ac.uk](mailto:jegak.seo.20@ucl.ac.uk)

**Keywords:** diet survey; food contamination; antibiotic residues; low-temperature partitioning extraction; exposure modelling

**Table S1.** Linearity, limit of detection (LOD), limit of quantification (LOQ) and,  $R^2$  of each antibiotic's calibration curve.

| Classes       | Antibiotics     | Linearity | LOD ( $\mu\text{g/L}$ ) | LOQ ( $\mu\text{g/L}$ ) | $R^2$  |
|---------------|-----------------|-----------|-------------------------|-------------------------|--------|
| Tetracyclines | Tetracycline    | 0.9995    | 10.949                  | 33.179                  | 0.9995 |
|               | Oxytetracycline | 0.9997    | 8.498                   | 25.750                  | 0.9997 |
| Penicillin    | Amoxicillin     | 0.9995    | 10.345                  | 31.347                  | 0.9995 |
|               | Ampicillin      | 0.9995    | 11.018                  | 33.387                  | 0.9995 |
| Sulfonamides  | Sulfadiazine    | 0.9997    | 8.324                   | 25.224                  | 0.9997 |
|               | Trimethoprim    | 0.9993    | 12.534                  | 37.980                  | 0.9994 |
| Macrolides    | Erythromycin    | 0.9999    | 5.751                   | 17.428                  | 0.9999 |
|               | Tylosin         | 0.9996    | 10.027                  | 30.385                  | 0.9996 |
| Quinolones    | Ciprofloxacin   | 0.9996    | 8.933                   | 27.071                  | 0.9996 |
|               | Enrofloxacin    | 0.9994    | 11.707                  | 35.475                  | 0.9994 |

**Figure S1.** The 10 target antibiotics (tetracycline, oxytetracycline, amoxicillin, ampicillin, sulfadiazine, trimethoprim, erythromycin, tylosin, ciprofloxacin, and enrofloxacin): reconstructed ion chromatogram for  $[\text{M}+\text{H}]^+$ ,  $m/z \approx 445, 461, 366, 350, 251, 291, 734, 916, 332$ , and  $360$ , respectively.

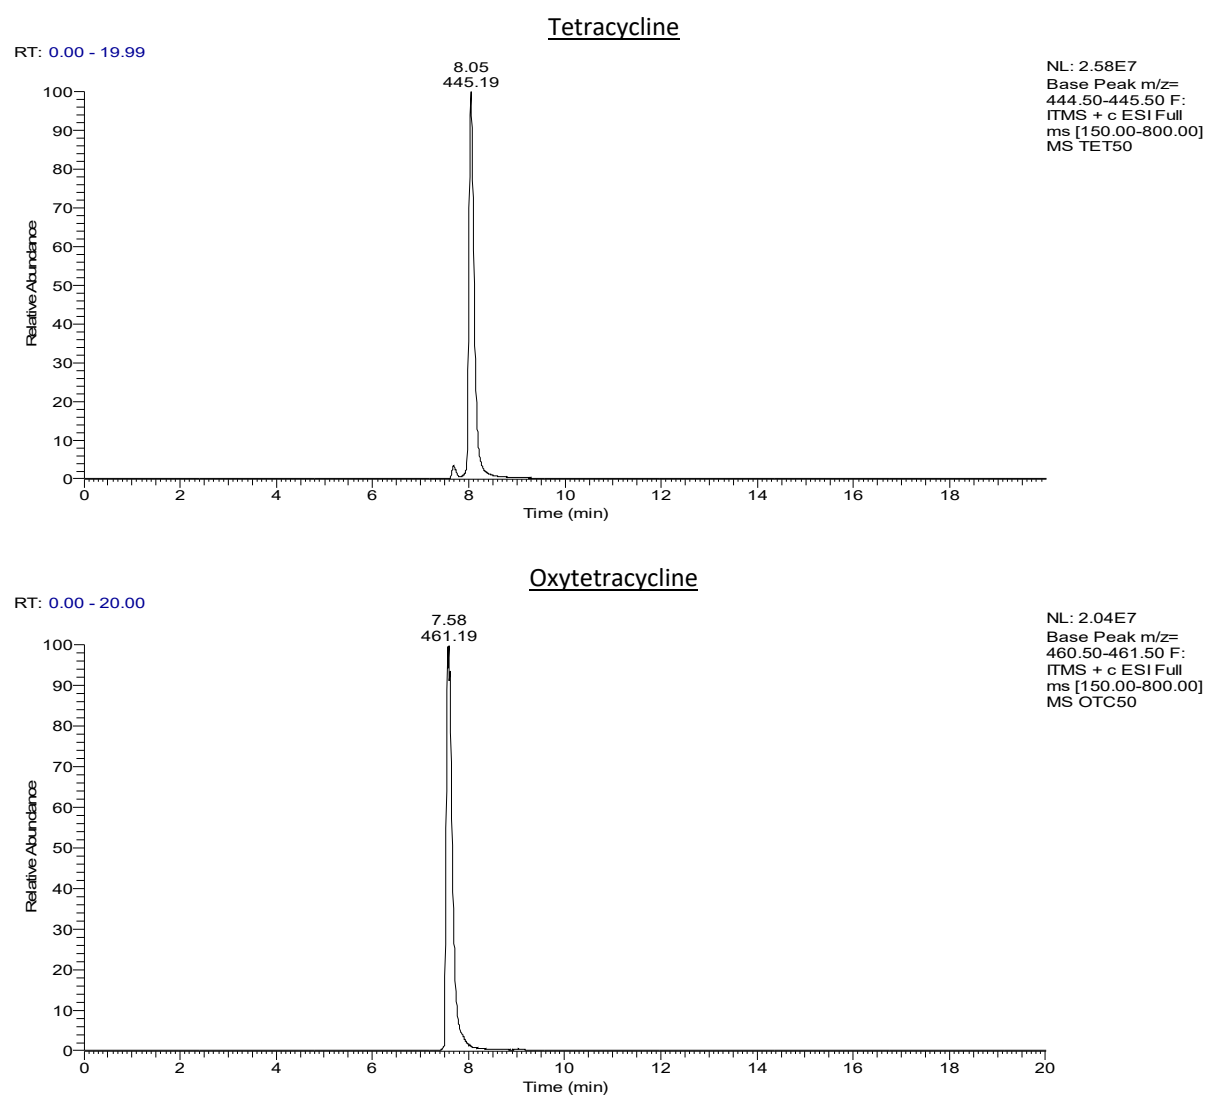

### Amoxicillin

RT: 0.00 - 20.00

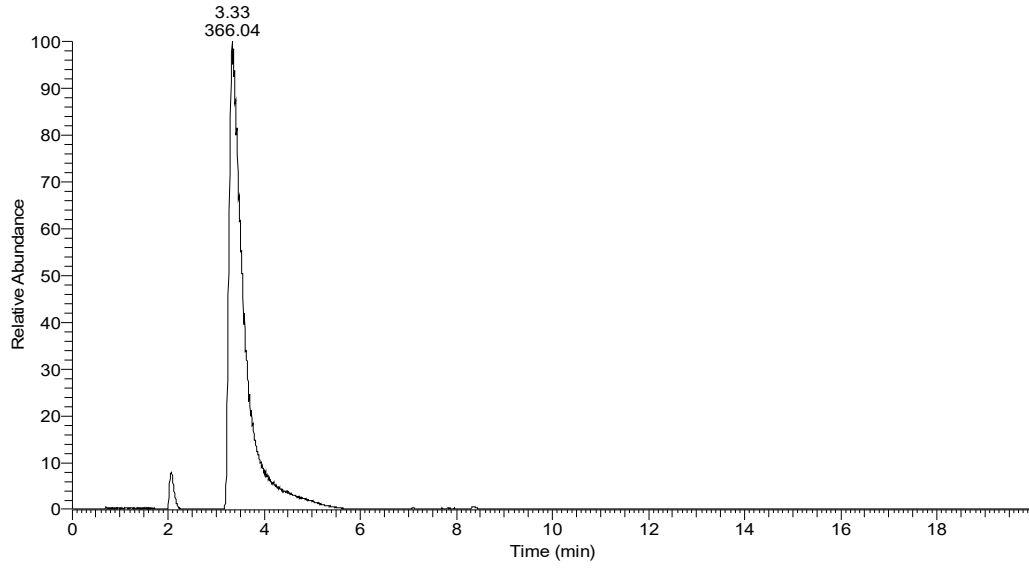

NL: 6.89E6  
Base Peak m/z=  
365.50-366.50 F:  
ITMS + c ESI Full  
ms [150.00-800.00]  
MS AMOX50

### Ampicillin

RT: 0.00 - 20.00

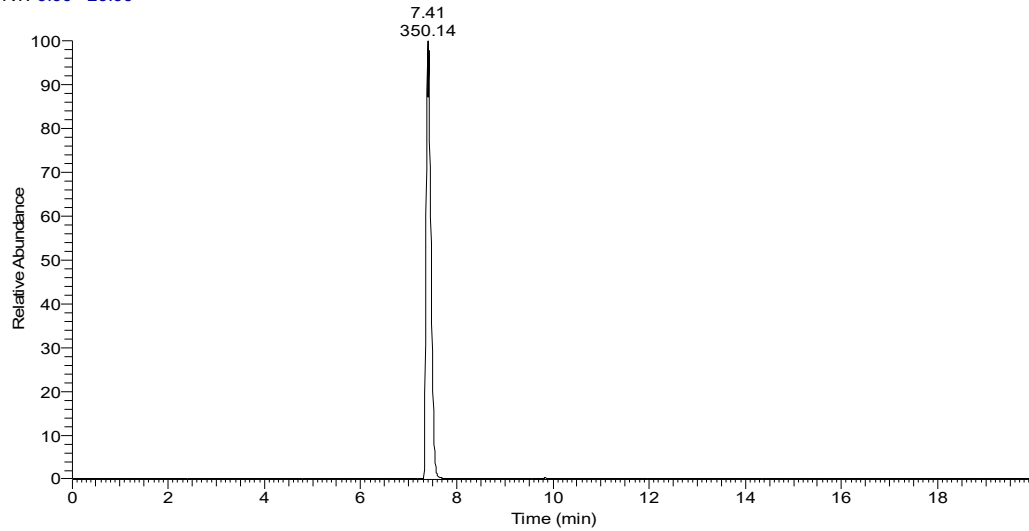

NL: 3.25E7  
Base Peak m/z=  
349.50-350.50 F:  
ITMS + c ESI Full  
ms [150.00-800.00]  
MS AMP50

### Sulfadiazine

RT: 0.00 - 20.00

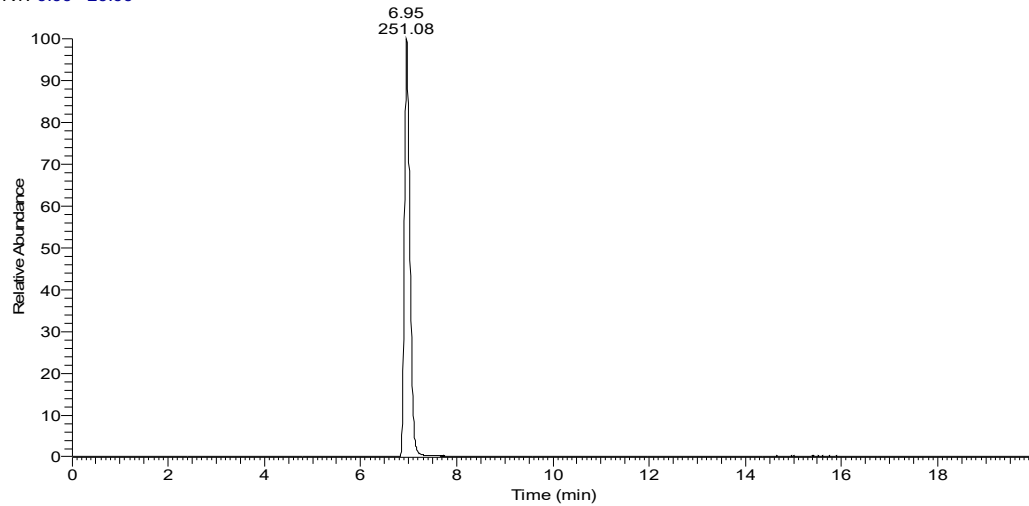

NL: 1.88E7  
Base Peak m/z=  
250.50-251.50 F:  
ITMS + c ESI Full  
ms [150.00-800.00]  
MS SDZ50

### Trimethoprim

RT: 0.00 - 20.00

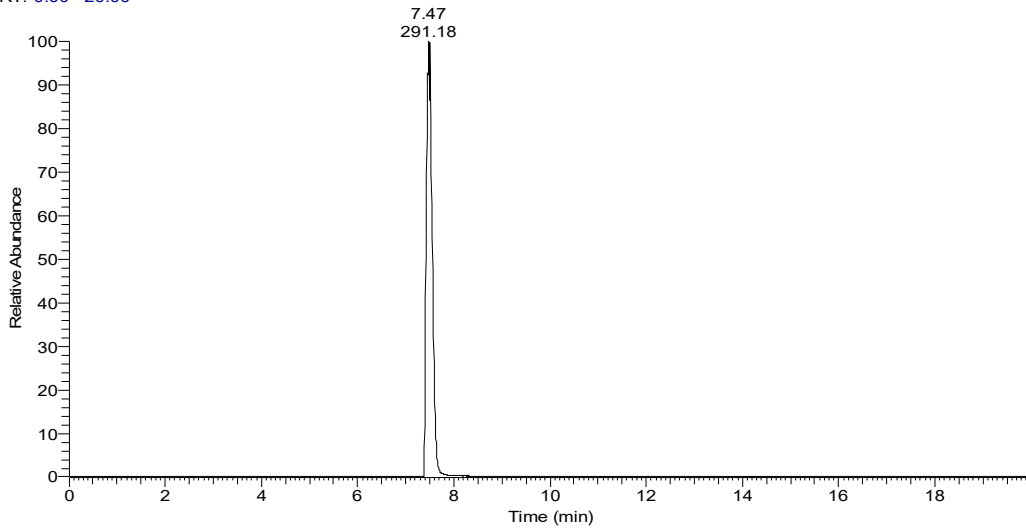

NL: 8.57E7  
Base Peak m/z= 290.50-291.50 F:  
ITMS + c ESI Full  
ms [150.00-800.00]  
MS TMP50

### Erythromycin

RT: 0.00 - 19.99

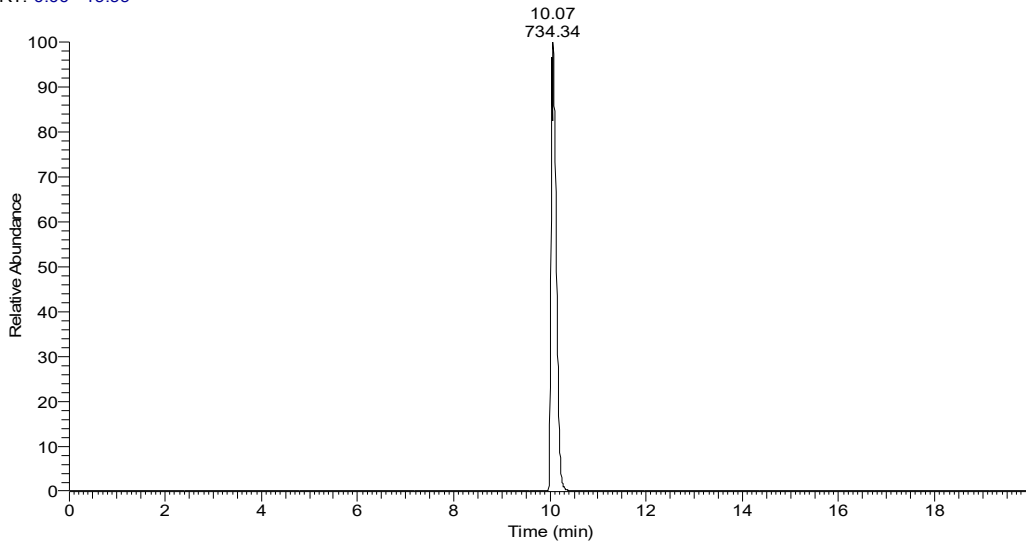

NL: 3.76E7  
Base Peak m/z= 733.50-734.50 F:  
ITMS + c ESI Full  
ms [150.00-800.00]  
MS ERY50

### Tylosin

RT: 0.00 - 20.00

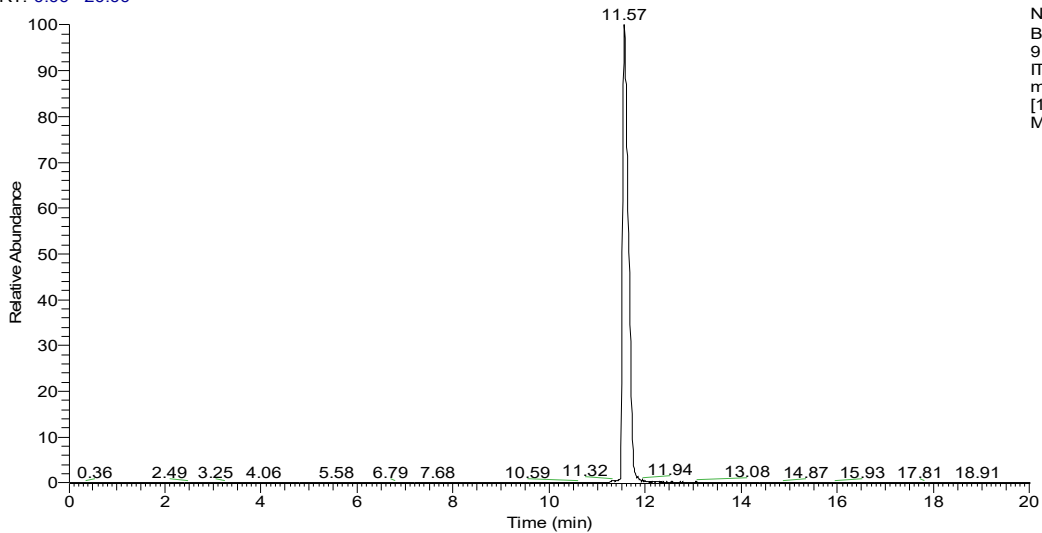

NL: 1.42E6  
Base Peak m/z= 916.00-917.00 F:  
ITMS + c ESI Full  
ms [150.00-1000.00]  
MS TYL50

Ciprofloxacin

RT: 0.00 - 20.00

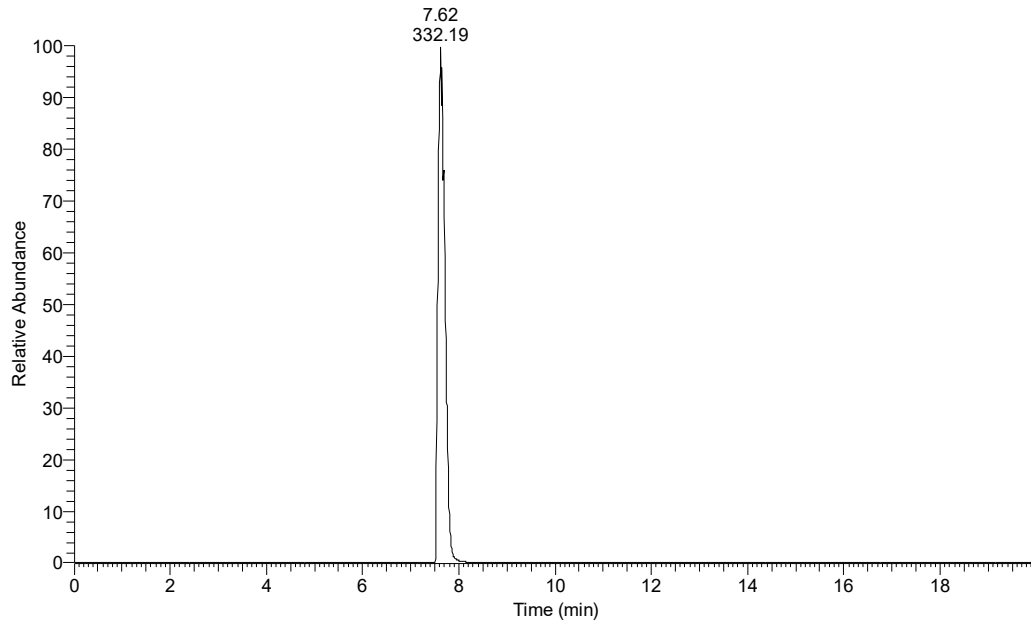

NL: 9.77E7  
Base Peak m/z=  
331.50-332.50 F:  
ITMS + c ESI Full  
ms [150.00-800.00]  
MS CIP50

Enrofloxacin

RT: 0.00 - 20.00

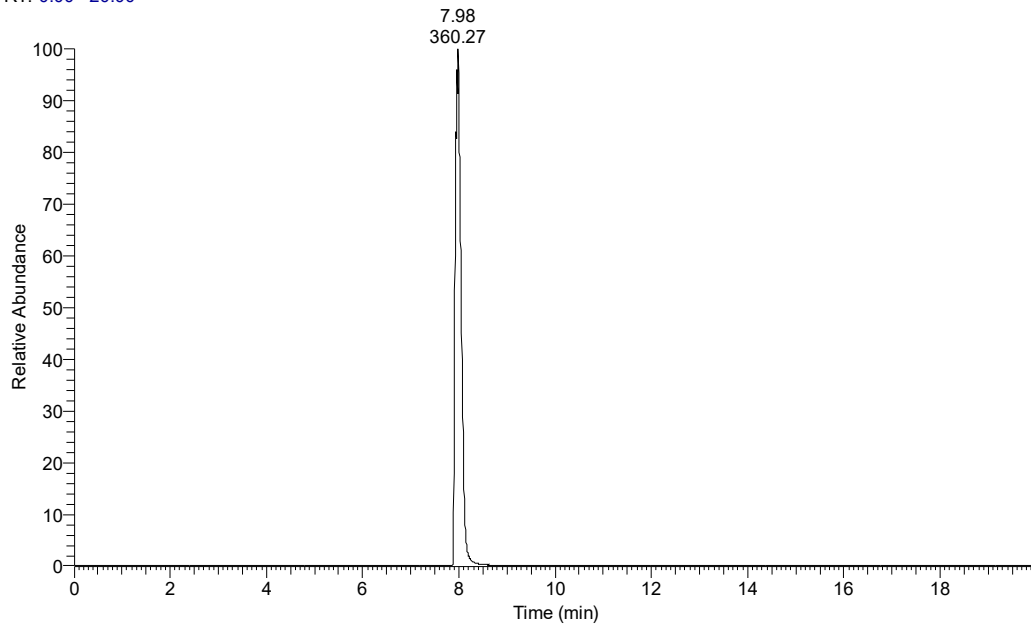

NL: 8.11E7  
Base Peak m/z=  
359.50-360.50 F:  
ITMS + c ESI Full  
ms [150.00-800.00]  
MS ENR50

**Table S2.** The LTPE method validation using LC-MS analysis. Calibration curves and LTPE methods by parameters accuracy (%) and Relative Standard Deviation (RSD; %) using triplicates of nominal concentration (50, 100, and 500 µg/L) and measured concentration (µg/L).

| Mean AB Standards Validation |     |       |               |                              |                               |              |         |
|------------------------------|-----|-------|---------------|------------------------------|-------------------------------|--------------|---------|
| Antibiotic                   | MW  | RT    | Measured Area | Nominal concentration (µg/L) | Measured concentration (µg/L) | Accuracy (%) | RSD (%) |
| Tetracycline                 | 445 | 8.13  | 195195        | 50.00                        | 48.97                         | 97.94        | 0.32    |
| Oxytetracycline              | 461 | 7.73  | 166300        | 50.00                        | 54.13                         | 108.25       | 0.34    |
| Amoxicillin                  | 366 | 3.51  | 69293         | 50.00                        | 52.72                         | 105.44       | 0.51    |
| Ampicillin                   | 350 | 7.41  | 241966        | 50.00                        | 55.61                         | 111.22       | 0.20    |
| Sulfadiazine                 | 251 | 6.97  | 129273        | 50.00                        | 48.67                         | 97.34        | 0.44    |
| Trimethoprim                 | 291 | 7.53  | 846428        | 50.00                        | 51.41                         | 102.82       | 0.11    |
| Erythromycin                 | 734 | 10.04 | 226506        | 50.00                        | 52.19                         | 104.38       | 0.87    |
| Tylosin                      | 916 | 11.53 | 9916          | 50.00                        | 50.54                         | 101.08       | 0.37    |
| Ciprofloxacin                | 332 | 7.76  | 418218        | 50.00                        | 48.60                         | 97.19        | 0.39    |
| Enrofloxacin                 | 360 | 8.06  | 704085        | 50.00                        | 52.79                         | 105.58       | 0.10    |

  

| Mean AB Standards Validation |     |       |               |                              |                               |              |         |
|------------------------------|-----|-------|---------------|------------------------------|-------------------------------|--------------|---------|
| Antibiotic                   | MW  | RT    | Measured Area | Nominal concentration (µg/L) | Measured concentration (µg/L) | Accuracy (%) | RSD (%) |
| Tetracycline                 | 445 | 8.06  | 389463        | 100.00                       | 101.92                        | 101.92       | 0.04    |
| Oxytetracycline              | 461 | 7.72  | 332537        | 100.00                       | 104.75                        | 104.75       | 0.08    |
| Amoxicillin                  | 366 | 3.52  | 138540        | 100.00                       | 105.32                        | 105.32       | 0.21    |
| Ampicillin                   | 350 | 7.46  | 482493        | 100.00                       | 106.51                        | 106.51       | 0.06    |
| Sulfadiazine                 | 251 | 6.91  | 257510        | 100.00                       | 101.13                        | 101.13       | 0.13    |
| Trimethoprim                 | 291 | 7.50  | 1693450       | 100.00                       | 103.23                        | 103.23       | 0.01    |
| Erythromycin                 | 734 | 10.04 | 445852        | 100.00                       | 104.10                        | 104.10       | 0.03    |
| Tylosin                      | 916 | 11.63 | 19256         | 100.00                       | 102.15                        | 102.15       | 0.76    |
| Ciprofloxacin                | 332 | 7.76  | 841564        | 100.00                       | 101.33                        | 101.33       | 0.02    |
| Enrofloxacin                 | 360 | 8.05  | 1408338       | 100.00                       | 102.26                        | 102.26       | 0.02    |

| Mean AB Standards Validation |     |       |               |                              |                               |              |         |
|------------------------------|-----|-------|---------------|------------------------------|-------------------------------|--------------|---------|
| Antibiotic                   | MW  | RT    | Measured Area | Nominal concentration (µg/L) | Measured concentration (µg/L) | Accuracy (%) | RSD (%) |
| Tetracycline                 | 445 | 8.07  | 1923085       | 500.00                       | 519.42                        | 103.88       | 0.60    |
| Oxytetracycline              | 461 | 7.64  | 1660534       | 500.00                       | 509.00                        | 101.80       | 0.34    |
| Amoxicillin                  | 366 | 3.62  | 690274        | 500.00                       | 522.92                        | 104.58       | 0.48    |
| Ampicillin                   | 350 | 7.45  | 2419374       | 500.00                       | 515.28                        | 103.06       | 0.51    |
| Sulfadiazine                 | 251 | 6.92  | 1289961       | 500.00                       | 523.26                        | 104.65       | 0.42    |
| Trimethoprim                 | 291 | 7.52  | 8476638       | 500.00                       | 518.45                        | 103.69       | 0.12    |
| Erythromycin                 | 734 | 10.01 | 2221920       | 500.00                       | 524.26                        | 104.85       | 0.28    |
| Tylosin                      | 916 | 11.68 | 91891         | 500.00                       | 506.37                        | 101.27       | 0.92    |
| Ciprofloxacin                | 332 | 7.83  | 4182029       | 500.00                       | 517.20                        | 103.44       | 0.43    |
| Enrofloxacin                 | 360 | 8.08  | 7036687       | 500.00                       | 497.68                        | 99.54        | 0.03    |

| Mean AB LTPE Validation |     |       |               |                              |                               |              |         |
|-------------------------|-----|-------|---------------|------------------------------|-------------------------------|--------------|---------|
| Antibiotic              | MW  | RT    | Measured Area | Nominal concentration (µg/L) | Measured concentration (µg/L) | Accuracy (%) | RSD (%) |
| Tetracycline            | 445 | 7.97  | 340633        | 100.00                       | 88.61                         | 88.61        | 0.31    |
| Oxytetracycline         | 461 | 7.65  | 295535        | 100.00                       | 93.48                         | 93.48        | 0.03    |
| Amoxicillin             | 366 | 1.94  | 117015        | 100.00                       | 88.97                         | 88.97        | 0.68    |
| Ampicillin              | 350 | 7.39  | 414491        | 100.00                       | 92.12                         | 92.12        | 0.76    |
| Sulfadiazine            | 251 | 6.91  | 236253        | 100.00                       | 92.44                         | 92.44        | 0.77    |
| Trimethoprim            | 291 | 7.43  | 1515047       | 100.00                       | 92.32                         | 92.32        | 0.63    |
| Erythromycin            | 734 | 10.05 | 397927        | 100.00                       | 92.76                         | 92.76        | 0.75    |
| Tylosin                 | 772 | 11.55 | 17439         | 100.00                       | 92.12                         | 92.12        | 0.46    |
| Ciprofloxacin           | 332 | 7.68  | 772549        | 100.00                       | 92.73                         | 92.73        | 0.60    |
| Enrofloxacin            | 360 | 7.97  | 1199189       | 100.00                       | 87.57                         | 87.57        | 0.18    |

**Table S3.** The recovery of LTPE method using 100 µg/L of 10 antibiotic mixture stock solution, and the recovery of using triplicates of pork chop matrix spiked with a 100 µg/L of 10 antibiotics mixture.

| Mean Spiked Meat Validation |       |               |                                          |                                                 |                                               |                             |                         |
|-----------------------------|-------|---------------|------------------------------------------|-------------------------------------------------|-----------------------------------------------|-----------------------------|-------------------------|
| Antibiotic                  | RT    | Measured Area | AB standard nominal concentration (µg/L) | Total AB concentration from spiked meat (µg/kg) | AB concentration from non-spiked meat (µg/kg) | Accuracy of spiked meat (%) | Accuracy of AB LTPE (%) |
| Tetracycline                | 8.06  | 345155        | 100.00                                   | 89.84                                           |                                               | 89.84                       | 88.61                   |
| Oxytetracycline             | 7.62  | 303293        | 100.00                                   | 95.84                                           |                                               | 95.84                       | 93.48                   |
| Amoxicillin                 | 2.05  | 2249514       | 100.00                                   | 1708.64                                         | 1616.09                                       | 92.55                       | 88.97                   |
| Ampicillin                  | 7.48  | 414539        | 100.00                                   | 92.13                                           |                                               | 92.13                       | 92.12                   |
| Sulfadiazine                | 6.81  | 523468        | 100.00                                   | 209.94                                          | 116.19                                        | 93.75                       | 92.44                   |
| Trimethoprim                | 7.68  | 9084446       | 100.00                                   | 555.45                                          | 461.68                                        | 93.77                       | 92.32                   |
| Erythromycin                | 10.37 | 402559        | 100.00                                   | 93.85                                           |                                               | 93.85                       | 92.76                   |
| Tylosin                     | 11.58 | 17858         | 100.00                                   | 94.43                                           |                                               | 94.43                       | 92.12                   |
| Ciprofloxacin               | 7.87  | 785378        | 100.00                                   | 94.33                                           |                                               | 94.33                       | 92.73                   |
| Enrofloxacin                | 8.06  | 1228007       | 100.00                                   | 89.60                                           |                                               | 89.60                       | 87.57                   |

**Table S4:** Minimum, maximum, median and, mean consumption (g) on meat products.

| Summer (g)          |       |      |        |      |                     |       |      |        |      |
|---------------------|-------|------|--------|------|---------------------|-------|------|--------|------|
| Meat Type (Time)    | Day 1 |      |        |      | Meat Type (Time)    | Day 2 |      |        |      |
|                     | Max.  | Min. | Median | Mean |                     | Max.  | Min. | Median | Mean |
| Pork (0800-0859)    | 100   | 40   | 80     | 88   | Pork (0800-0859)    | 90    | 40   | 80     | 86   |
| Chicken (1300-1359) | 600   | 100  | 200    | 236  | Beef (1300-1359)    | 300   | 100  | 200    | 194  |
| Fish (1800-1859)    | 400   | 100  | 180    | 198  | Chicken (1900-1959) | 400   | 100  | 200    | 222  |
| Winter (g)          |       |      |        |      |                     |       |      |        |      |
| Meat Type (Time)    | Day 1 |      |        |      | Meat Type (Time)    | Day 2 |      |        |      |
|                     | Max.  | Min. | Median | Mean |                     | Max.  | Min. | Median | Mean |
| Pork (0800-0859)    | 110   | 60   | 80     | 81   | Pork (0800-0859)    | 100   | 60   | 80     | 77   |
| Chicken (1300-1359) | 450   | 100  | 250    | 248  | Beef (1300-1359)    | 300   | 100  | 200    | 196  |
| Fish (1900-1959)    | 300   | 100  | 190    | 195  | Chicken (1900-1959) | 450   | 100  | 275    | 269  |

**Table S5.** Minimum, maximum and mean consumption (g or mL) on dairy products.

[illegible]

**Table S6.** Minimum, maximum, median, and mean intake (g or mL) of water.

| Time      | Summer (mL) |      |        |      |       |      |        |      | Winter (mL) |      |        |      |       |      |        |      |
|-----------|-------------|------|--------|------|-------|------|--------|------|-------------|------|--------|------|-------|------|--------|------|
|           | Day 1       |      |        |      | Day 2 |      |        |      | Day 1       |      |        |      | Day 2 |      |        |      |
|           | Min.        | Max. | Median | Mean | Min.  | Max. | Median | Mean | Min.        | Max. | Median | Mean | Min.  | Max. | Median | Mean |
| 0700-0759 | 350         | 350  | 350    | 350  | 200   | 350  | 275    | 275  | 120         | 350  | 150    | 207  | 200   | 300  | 200    | 233  |
| 0800-0859 | 180         | 420  | 200    | 241  | 60    | 400  | 250    | 252  | 180         | 500  | 320    | 322  | 170   | 500  | 300    | 315  |
| 0900-0959 | 60          | 700  | 225    | 278  | 40    | 500  | 325    | 282  | 150         | 500  | 225    | 268  | 180   | 500  | 250    | 304  |
| 1000-1059 | 60          | 350  | 200    | 202  | 60    | 350  | 225    | 210  | 40          | 350  | 120    | 140  | 140   | 350  | 215    | 219  |
| 1100-1159 | 180         | 250  | 200    | 210  | 60    | 180  | 150    | 130  | 80          | 250  | 140    | 140  | 60    | 300  | 150    | 158  |
| 1200-1259 | 120         | 500  | 180    | 243  | 180   | 500  | 250    | 306  | 40          | 400  | 135    | 164  | 180   | 600  | 325    | 408  |
| 1300-1359 | 150         | 1140 | 250    | 368  | 180   | 850  | 300    | 374  | 140         | 700  | 300    | 354  | 180   | 1000 | 375    | 453  |
| 1400-1459 | 150         | 700  | 350    | 376  | 120   | 500  | 200    | 250  | 100         | 400  | 200    | 219  | 120   | 300  | 180    | 201  |
| 1500-1559 | 150         | 500  | 250    | 303  | 60    | 350  | 180    | 242  | 50          | 400  | 150    | 166  | 180   | 500  | 300    | 310  |
| 1600-1659 | 180         | 750  | 465    | 465  | 60    | 500  | 180    | 247  | 100         | 400  | 200    | 244  | 60    | 200  | 100    | 126  |
| 1700-1759 | 40          | 500  | 300    | 285  | 180   | 350  | 275    | 270  | 100         | 400  | 300    | 275  | 180   | 350  | 300    | 276  |
| 1800-1859 | 180         | 500  | 225    | 268  | 180   | 300  | 250    | 254  | 80          | 500  | 190    | 213  | 100   | 500  | 250    | 254  |
| 1900-1959 | -           | 1050 | 360    | 398  | 180   | 1050 | 250    | 384  | 180         | 750  | 200    | 339  | 180   | 800  | 275    | 326  |
| 2000-2059 | 150         | 700  | 190    | 263  | 180   | 500  | 200    | 288  | 100         | 500  | 190    | 260  | 100   | 360  | 200    | 203  |
| 2100-2159 | 180         | 360  | 200    | 235  | 150   | 360  | 200    | 228  | 180         | 200  | 200    | 193  | 100   | 300  | 180    | 194  |
| 2200-2259 | 180         | 250  | 215    | 215  | 180   | 180  | 180    | 180  | 120         | 180  | 180    | 160  | 180   | 200  | 190    | 190  |
| 2300-2359 | 200         | 200  | 200    | 200  | 180   | 200  | 250    | 227  | 150         | 200  | 175    | 175  | 170   | 180  | 180    | 177  |
